# Supplementary material for: Amino acid modified gadofullerene protects against insulin resistance induced by oxidative stress in 3T3-L1 adipocytes
Source: Royal Society of Chemistry journal article supplement (doi:10.1039/d0tb01296c), 2020-01-01
Supplement: d0tb01296c1.pdf [file d0tb01296c1.pdf]

## Supporting Information

### Amino acid modified gadofullerene protects against insulin resistance induced by oxidative stress in 3T3-L1 adipocytes

Tong Yu <sup>†a,b</sup>, Wang Jia <sup>†a,b</sup>, Mingming Zhen <sup>a,b\*</sup>, Yue Zhou <sup>a,b</sup>, Jie Li <sup>a,b</sup> and Chunru Wang <sup>a,b\*</sup>

<sup>a</sup>Beijing National Laboratory for Molecular Sciences, Key Laboratory of Molecular Nanostructure and Nanotechnology, CAS Research/Education Center for Excellence in Molecular Sciences, Institute of Chemistry, Chinese Academy of Sciences, Beijing 100190, China.

<sup>b</sup>University of Chinese Academy of Sciences, Beijing 100049, China.

<sup>†</sup>These two authors contributed equally to this work. .

\*E-mail: zhenmm@iccas.ac.cn, crwang@iccas.ac.cn.

#### Contents

1. Characterizations of GF-Ala
2. Cytotoxicity test of GF-Ala
3. Concentration of H<sub>2</sub>O<sub>2</sub> generated by glucose oxidase

#### 1. Characterizations of GF-Ala.

Solid GF-Ala NPs were obtained by freeze drying, then characterized by elemental analysis (EA), TGA and XPS. The TGA result showed GF-Ala contained 12.4% moisture (Fig. S1).

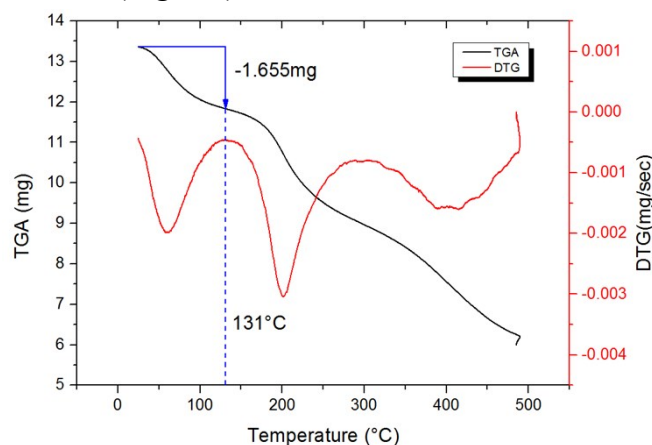

**Fig. S1** Thermogravimetric analysis by a TGA spectrometer to determine the contents of water in GF-Ala (under N<sub>2</sub>, 5°C/min, 20-500°C).

**Table S1** Elemental analysis of carbon, hydrogen, and nitrogen contents in GF-Ala.

|        | C (%) | H (%) | N (%) |
|--------|-------|-------|-------|
| GF-Ala | 55.36 | 2.81  | 3.34  |

## 2. Cytotoxicity tests of GF-Ala

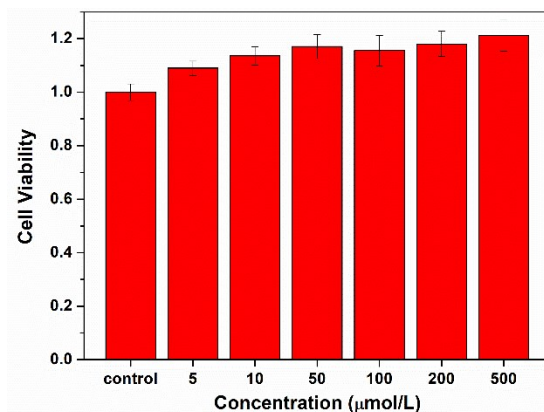

**Fig. S2** Cell viability of 3T3-L1 adipocytes incubated with GF-Ala at various concentration in the dark for 24 h.

## 3. Concentration of H<sub>2</sub>O<sub>2</sub> generated by glucose oxidase

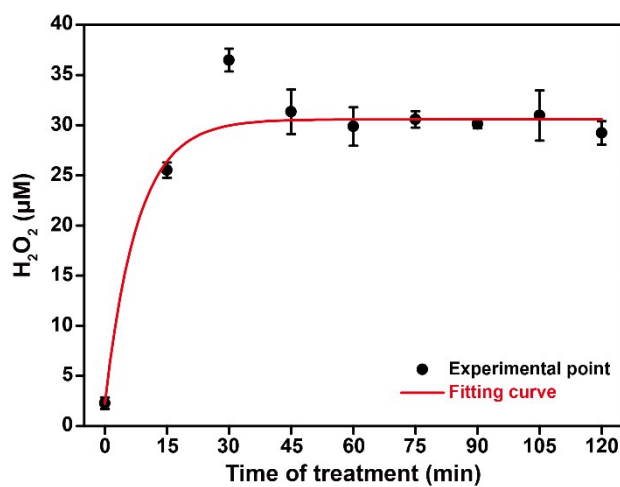

**Fig. S3** Concentration of H<sub>2</sub>O<sub>2</sub> generated by glucose oxidase.
